# Supplementary material for: Dose-Dependent AMPK-Dependent and Independent Mechanisms of Berberine and Metformin Inhibition of mTORC1, ERK, DNA Synthesis and Proliferation in Pancreatic Cancer Cells
Source: PubMed Central journal article supplement (PMC4262417; doi:10.1371/journal.pone.0114573), 2014-12-10
Supplement: pone.0114573.s001.pdf [file pone.0114573.s001.pdf]

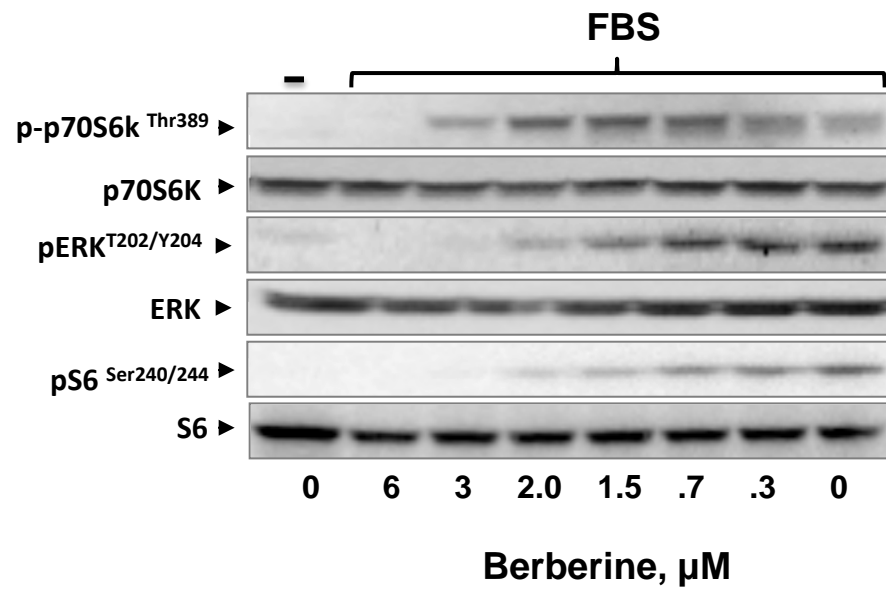

Supplementary Figure S1.
